Retraction

## Retraction: Long non-coding RNA XIST promotes cell growth and metastasis through regulating miR-139-5p mediated Wnt/ $\beta$ -catenin signaling pathway in bladder cancer

Yangyang Hu<sup>1,2</sup>, Chao Deng<sup>1</sup>, He Zhang<sup>1</sup>, Jing Zhang<sup>1</sup>, Bo Peng<sup>2</sup> and Chuanyi Hu<sup>1</sup>

<sup>1</sup>Department of Urology, Gongli Hospital, The Second Military Medical University, Shanghai 200135, China

<sup>2</sup>Department of First Clinical Medical College, Nanjing Medical University, Nanjing 211166, China

**Published:** November 17, 2022

**Copyright:** © 2022 Hu et al. This is an open access article distributed under the terms of the [Creative Commons Attribution License](#) (CC BY 3.0), which permits unrestricted use, distribution, and reproduction in any medium, provided the original author and source are credited.

**This article has been retracted:** Oncotarget requested the original data for this paper to address concerns regarding image duplication. The authors were unable to retrieve the data. As a result, all authors have agreed to the retraction of this paper from Oncotarget.

Original article: Oncotarget. 2017; 8:94554–94568. <https://doi.org/10.18632/oncotarget.21791>
